# Supplementary material for: Pharmacokinetic and Lipidomic Assessment of the In Vivo Effects of Parishin A-Isorhynchophylline in Rat Migraine Models
Source: Hindawi journal article supplement (doi:10.1155/2020/9101598), 2020-07-06
Supplement: f1 [file 9101598.f1.pdf]

---

## Supplementary materials

**Figure S1.** Representative MRM chromatograms of the determined compounds at 15 minutes after co-administration in migraine model rats.

**Figure S2.** The representative total ion chromatogram (TIC) of plasma samples in positive and negative ion mode for pharmacokinetics study.

**Figure S3.** Calibration curves of isorhynchophylline, rhynchophylline, parishin A and gastrodin in plasma samples

**Figure S4.** The representative total ion chromatogram (TIC) of plasma samples in positive and negative ion mode for lipidomics study.

**Table S1.** Inter- and intra-day precision, accuracy for the determining of compounds.

**Table S2.** Extraction recovery, matrix effect and Stability study for the determining of the compounds.

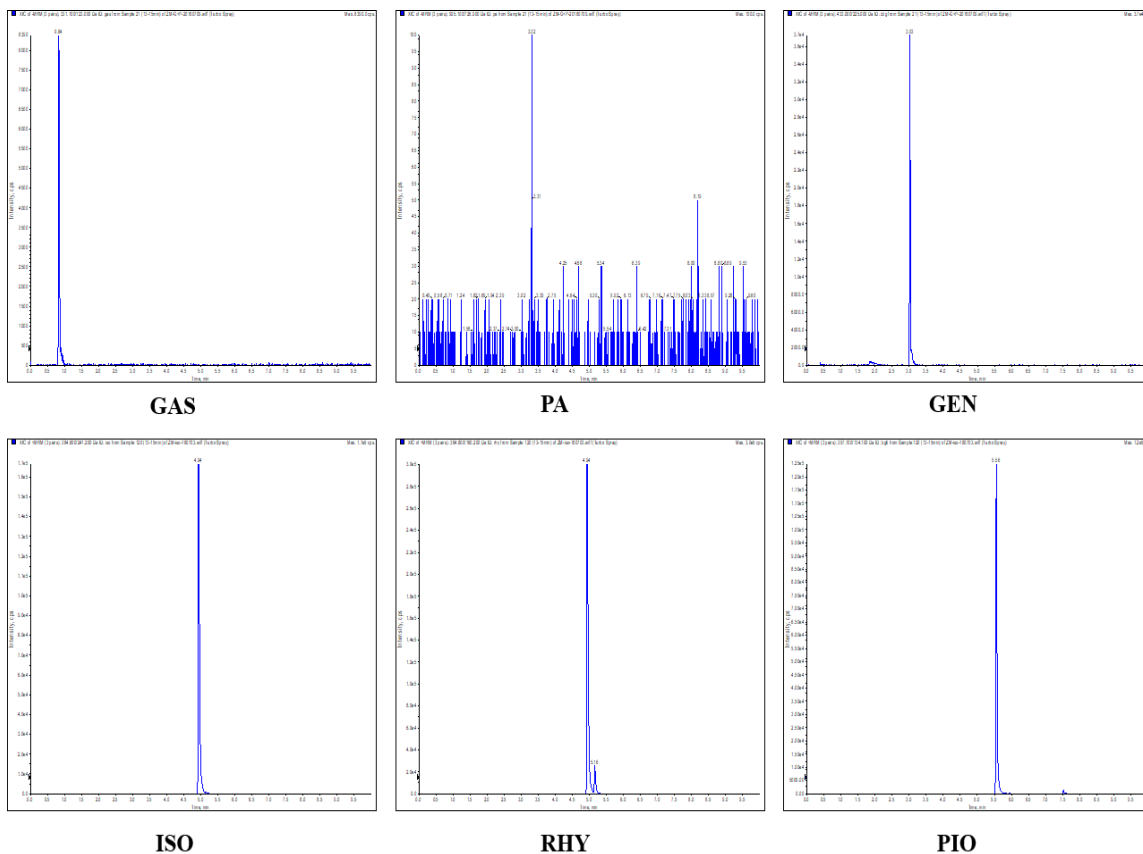

**Figure S1.** Representative MRM chromatograms of the determined compounds at 15 minutes after co-administration in migraine model rats.

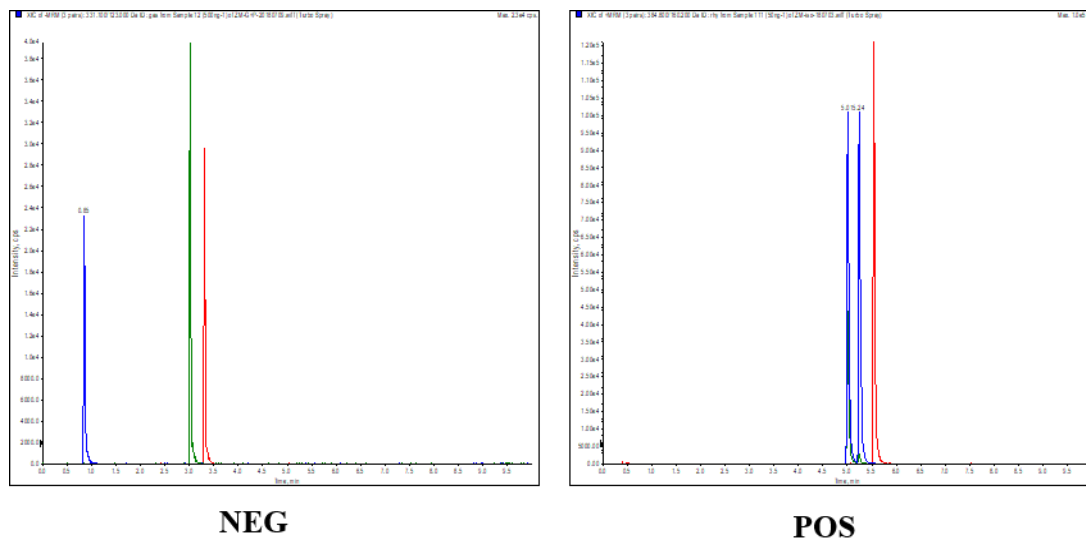

**Figure S2.** The representative total ion chromatogram (TIC) of plasma samples in positive and negative ion mode for pharmacokinetics study.

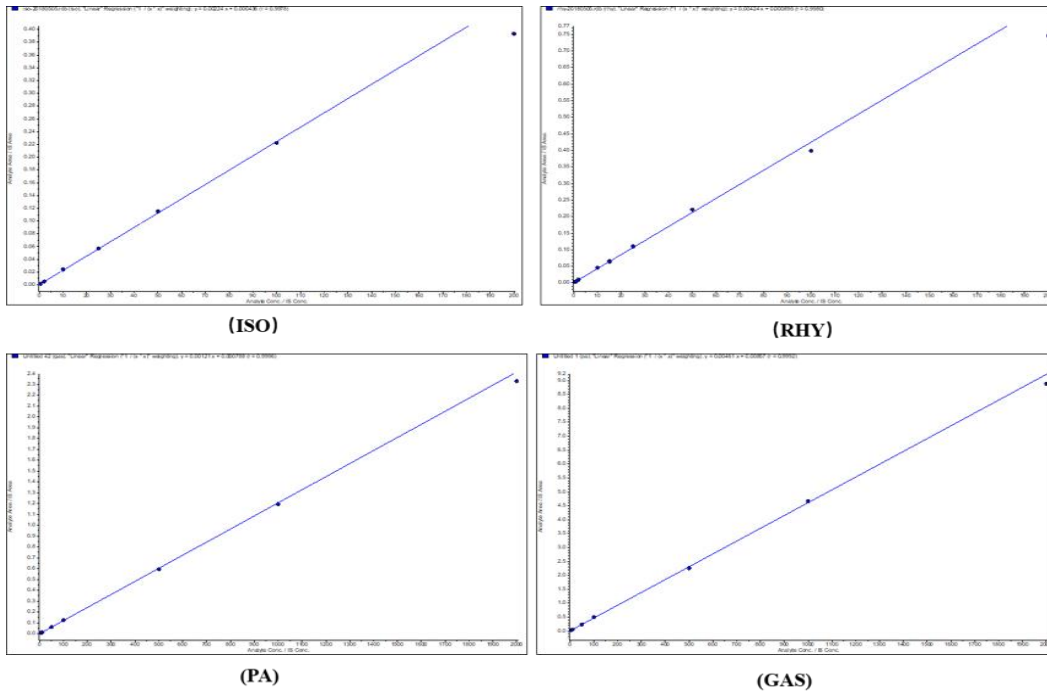

**Figure S3.** Calibration curves of ISO, RHY, PA and GAS in plasma samples

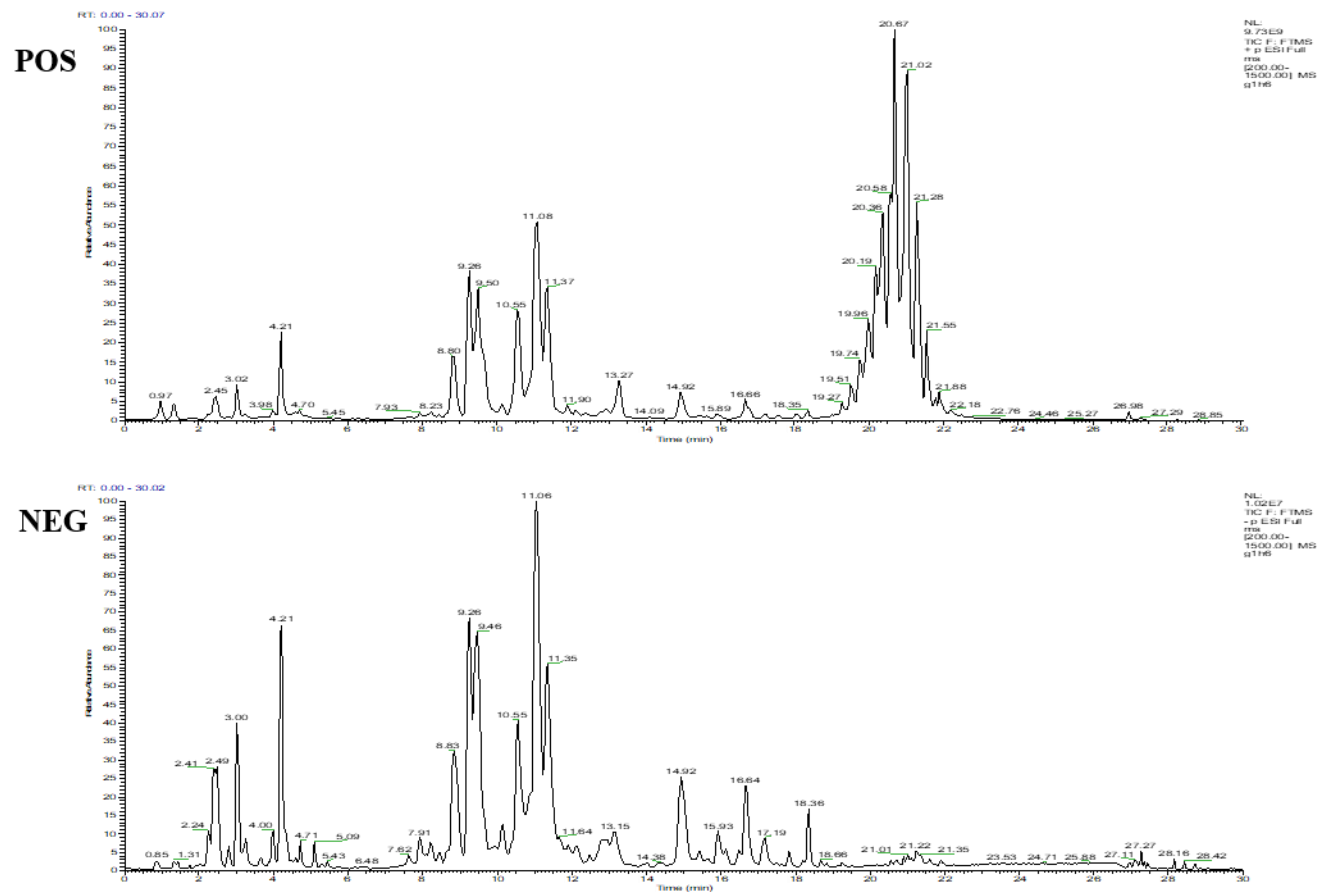

**Figure S4.** The representative total ion chromatogram (TIC) of plasma samples in positive and negative ion mode for lipidomics study.

**Table S1.** Inter- and intra-day precision, accuracy for the determining of compounds.

| Compounds | Prepared conc<br>(ng / m L) | Inter-batch (n=5)                          |                     |                       | Intra-batch (n=5)                         |                     |                       |
|-----------|-----------------------------|--------------------------------------------|---------------------|-----------------------|-------------------------------------------|---------------------|-----------------------|
|           |                             | Measured conc<br>(Mean $\pm$ SD, ng / m L) | Accuracy<br>(RE, %) | Precision<br>(RSD, %) | Measured conc<br>(Mean $\pm$ SD ng / m L) | Accuracy<br>(RE, %) | Precision<br>(RSD, %) |
| PA        | 5                           | 4.90 $\pm$ 0.31                            | 2.10                | 4.98                  | 4.93 $\pm$ 0.25                           | 1.24                | 2.53                  |
|           | 15                          | 14.34 $\pm$ 0.70                           | 4.44                | 4.53                  | 13.94 $\pm$ 0.83                          | 7.08                | 3.04                  |
|           | 150                         | 159.80 $\pm$ 5.07                          | 6.60                | 4.02                  | 157.80 $\pm$ 3.42                         | 5.20                | 6.87                  |
|           | 1500                        | 1520.00 $\pm$ 76.49                        | 1.12                | 5.09                  | 1512.00 $\pm$ 50.70                       | 0.86                | 3.01                  |
| GAS       | 5                           | 4.99 $\pm$ 0.33                            | 0.08                | 3.06                  | 5.05 $\pm$ 0.33                           | 1.10                | 4.22                  |
|           | 15                          | 14.02 $\pm$ 0.70                           | 6.56                | 5.63                  | 14.04 $\pm$ 0.77                          | 6.36                | 4.67                  |
|           | 150                         | 155.00 $\pm$ 2.55                          | 3.83                | 3.28                  | 152.00 $\pm$ 4.74                         | 1.28                | 6.71                  |
|           | 1500                        | 1586.00 $\pm$ 40.99                        | 5.60                | 2.24                  | 1574.00 $\pm$ 87.92                       | 4.84                | 2.50                  |
| ISO       | 0.5                         | 0.50 $\pm$ 0.03                            | 0.42                | 6.02                  | 0.51 $\pm$ 0.03                           | 2.64                | 6.47                  |
|           | 1                           | 0.97 $\pm$ 0.08                            | 3.17                | 7.29                  | 0.99 $\pm$ 0.03                           | 0.78                | 2.62                  |
|           | 15                          | 16.60 $\pm$ 0.60                           | 3.82                | 3.52                  | 14.60 $\pm$ 0.30                          | 2.70                | 2.24                  |
|           | 150                         | 142.33 $\pm$ 4.03                          | 5.20                | 7.25                  | 146.00 $\pm$ 1.22                         | 2.76                | 2.21                  |
| RHY       | 0.5                         | 0.50 $\pm$ 0.03                            | 0.33                | 6.00                  | 0.50 $\pm$ 0.02                           | 0.09                | 8.38                  |
|           | 1                           | 0.99 $\pm$ 0.04                            | 0.44                | 3.81                  | 1.03 $\pm$ 0.04                           | 2.88                | 6.23                  |
|           | 15                          | 15.75 $\pm$ 0.49                           | 5.00                | 3.11                  | 15.42 $\pm$ 0.16                          | 2.80                | 1.50                  |
|           | 150                         | 141.17 $\pm$ 4.22                          | 5.20                | 8.39                  | 141.17 $\pm$ 3.87                         | 6.50                | 2.74                  |

**Table S2.** Extraction recovery, matrix effect and Stability study for the determining of the compounds.

| Com- pounds | Prepared conc(ng/mL) | Extraction recovery (n=6)     |         | Matrix effect(n=6)            |         | Stability study ((n=6, Mean $\pm$ SD) |         |                                     |         |                                       |         |
|-------------|----------------------|-------------------------------|---------|-------------------------------|---------|---------------------------------------|---------|-------------------------------------|---------|---------------------------------------|---------|
|             |                      | Measured conc (Mean $\pm$ SD) | RSD (%) | Measured conc (Mean $\pm$ SD) | RSD (%) | Short-term stability (Mean $\pm$ SD)  | RSD (%) | Long-term stability (Mean $\pm$ SD) | RSD (%) | Freeze-thaw stability (Mean $\pm$ SD) | RSD (%) |
| PA          | 15                   | 13.55 $\pm$ 0.97              | 7.17    | 15.35 $\pm$ 1.31              | 8.59    | 15.26 $\pm$ 0.93                      | 5.95    | 14.21 $\pm$ 0.83                    | 5.84    | 13.35 $\pm$ 0.5                       | 3.75    |
|             | 150                  | 150.62 $\pm$ 5.78             | 3.83    | 151.66 $\pm$ 2.60             | 1.71    | 137.00 $\pm$ 2.82                     | 2.06    | 145.00 $\pm$ 1.52                   | 1.04    | 152.00 $\pm$ 2.8                      | 1.84    |
|             | 1500                 | 1467.60 $\pm$ 80.70           | 5.50    | 1602.45 $\pm$ 68.07           | 4.29    | 1543.00 $\pm$ 50.25                   | 3.26    | 1499.00 $\pm$ 63.21                 | 4.21    | 1445.00 $\pm$ 70.97                   | 4.91    |
| GAS         | 15                   | 13.74 $\pm$ 0.71              | 5.14    | 14.84 $\pm$ 0.79              | 5.31    | 13.82 $\pm$ 0.21                      | 1.52    | 15.46 $\pm$ 0.61                    | 3.95    | 14.28 $\pm$ 0.31                      | 2.17    |
|             | 150                  | 150.30 $\pm$ 4.28             | 2.85    | 146.24 $\pm$ 5.28             | 3.61    | 132.16 $\pm$ 10.20                    | 7.70    | 140.00 $\pm$ 4.83                   | 3.45    | 155.00 $\pm$ 7.28                     | 4.70    |
|             | 1500                 | 1508.40 $\pm$ 34.5            | 2.30    | 1589.55 $\pm$ 42.30           | 2.66    | 1435.00 $\pm$ 30.38                   | 2.11    | 1556.00 $\pm$ 50.50                 | 3.25    | 1450.00 $\pm$ 77.17                   | 5.32    |
| ISO         | 1                    | 0.91 $\pm$ 0.04               | 4.33    | 1.06 $\pm$ 0.01               | 11.52   | 0.93 $\pm$ 0.03                       | 3.23    | 0.88 $\pm$ 0.01                     | 11.36   | 0.90 $\pm$ 0.05                       | 5.55    |
|             | 15                   | 15.03 $\pm$ 0.78              | 5.17    | 15.66 $\pm$ 0.77              | 4.91    | 15.12 $\pm$ 1.00                      | 6.61    | 14.23 $\pm$ 0.67                    | 4.71    | 14.83 $\pm$ 1.32                      | 8.90    |
|             | 150                  | 153.74 $\pm$ 6.12             | 3.98    | 155.54 $\pm$ 5.82             | 3.74    | 147.89 $\pm$ 3.83                     | 2.59    | 138.25 $\pm$ 2.65                   | 1.91    | 155.65 $\pm$ 5.00                     | 3.21    |
| RHY         | 1                    | 0.97 $\pm$ 0.07               | 6.98    | 0.90 $\pm$ 0.09               | 9.95    | 1.01 $\pm$ 0.04                       | 3.96    | 1.06 $\pm$ 0.05                     | 4.72    | 0.98 $\pm$ 0.06                       | 6.12    |
|             | 15                   | 14.63 $\pm$ 0.43              | 2.93    | 15.70 $\pm$ 0.87              | 5.56    | 13.38 $\pm$ 1.51                      | 11.28   | 14.16 $\pm$ 1.20                    | 8.47    | 13.53 $\pm$ 0.8                       | 5.91    |
|             | 150                  | 154.65 $\pm$ 4.94             | 3.18    | 154.32 $\pm$ 7.09             | 4.60    | 155.83 $\pm$ 6.12                     | 3.92    | 134.28 $\pm$ 3.16                   | 2.35    | 145.55 $\pm$ 5.12                     | 3.52    |
